# Supplementary material for: A Novel Fused Optimization Algorithm of Genetic Algorithm and Ant Colony Optimization
Source: Hindawi journal article supplement (doi:10.1155/2016/2167413), 2016-01-01
Supplement: f1 [file 2167413.f1.pdf]

## Appendix

**Table 1**

Fitness value of potential suppliers by TOPSIS

|        |        |        |        |        |        |        |        |        |        |        |        |        |        |       |
|--------|--------|--------|--------|--------|--------|--------|--------|--------|--------|--------|--------|--------|--------|-------|
| 0.389, | 0.443, | 0.106, | 0.921, | 0.553, | 0.757, | 0.085, | 0.564, | 0.950, | 0.178, | 0.673, | 0.179, | 0.034, | 0.684, | 0.187 |
| 0.067, | 0.478, | 0.141, | 0.448, | 0.884, | 0.543, | 0.755, | 0.548, | 0.888, | 0.244, | 0.679, | 0.573, | 0.203, | 0.209, | 0.035 |
| 0.623, | 0.421, | 0.105, | 0.662, | 0.891, | 0.600, | 0.624, | 0.217, | 0.382, | 0.739, | 0.482, | 0.894, | 0.869, | 0.098, | 0.995 |
| 0.735, | 0.087, | 0.112, | 0.854, | 0.712, | 0.862, | 0.417, | 0.771, | 0.493, | 0.088, | 0.622, | 0.168, | 0.768, | 0.976, | 0.838 |
| 0.555, | 0.486, | 0.154, | 0.792, | 0.604, | 0.842, | 0.467, | 0.183, | 0.565, | 0.991, | 0.308, | 0.723, | 0.248, | 0.378, | 0.090 |
| 0.173, | 0.946, | 0.821, | 0.896, | 0.925, | 0.986, | 0.035, | 0.995, | 0.129, | 0.507, | 0.915, | 0.236, | 0.803, | 0.657, | 0.483 |
| 0.605, | 0.485, | 0.004, | 0.974, | 0.220, | 0.955, | 0.969, | 0.988, | 0.070, | 0.218, | 0.109, | 0.940, | 0.433, | 0.704, | 0.264 |
| 0.206, | 0.049, | 0.290, | 0.473, | 0.306, | 0.078, | 0.561, | 0.751, | 0.813, | 0.231, | 0.705, | 0.071, | 0.654, | 0.329, | 0.401 |
| 0.214, | 0.418, | 0.324, | 0.109, | 0.649, | 0.771, | 0.004, | 0.585, | 0.239, | 0.831, | 0.199, | 0.689, | 0.104, | 0.024, | 0.974 |
| 0.876, | 0.079, | 0.248, | 0.395, | 0.382, | 0.456, | 0.201, | 0.479, | 0.364, | 0.814, | 0.681, | 0.858, | 0.217, | 0.047, | 0.806 |
| 0.320, | 0.686, | 0.977, | 0.085, | 0.380, | 0.993, | 0.511, | 0.455, | 0.211, | 0.334, | 0.726, | 0.992, | 0.553, | 0.615, | 0.510 |
| 0.192, | 0.883, | 0.513, | 0.403, | 0.257, | 0.451, | 0.451, | 0.406, | 0.595, | 0.717, | 0.868, | 0.232, | 0.236, | 0.354, | 0.708 |
| 0.662, | 0.720, | 0.630, | 0.531, | 0.823, | 0.997, | 0.999, | 0.881, | 0.675, | 0.433, | 0.424, | 0.829, | 0.996, | 0.933, | 0.225 |
| 0.391, | 0.457, | 0.259, | 0.505, | 0.384, | 0.290, | 0.651, | 0.569, | 0.007, | 0.479, | 0.767, | 0.932, | 0.602, | 0.773, | 0.783 |
| 0.731, | 0.146, | 0.030, | 0.405, | 0.438, | 0.348, | 0.241, | 0.626, | 0.484, | 0.864, | 0.030, | 0.105, | 0.330, | 0.040, | 0.628 |

**Table 2**

Partial data of simulation case

| Material              | Supplier        | Q    | C  | T   | D    |
|-----------------------|-----------------|------|----|-----|------|
| <b>P<sub>1</sub></b>  | S <sub>1</sub>  | 0.45 | 93 | 7.1 | 0.28 |
|                       | S <sub>2</sub>  | 0.41 | 90 | 7.5 | 0.23 |
|                       | S <sub>3</sub>  | 0.38 | 96 | 6.9 | 0.25 |
| <b>P<sub>2</sub></b>  | S <sub>4</sub>  | 0.41 | 80 | 4.8 | 0.36 |
|                       | S <sub>5</sub>  | 0.46 | 83 | 4.3 | 0.41 |
|                       | S <sub>6</sub>  | 0.39 | 87 | 3.7 | 0.34 |
| <b>P<sub>3</sub></b>  | S <sub>7</sub>  | 0.37 | 59 | 5.3 | 0.47 |
|                       | S <sub>8</sub>  | 0.41 | 67 | 5.5 | 0.52 |
|                       | S <sub>9</sub>  | 0.35 | 63 | 4.5 | 0.45 |
|                       | S <sub>10</sub> | 0.33 | 54 | 5.1 | 0.49 |
|                       | S <sub>11</sub> | 0.39 | 60 | 4.9 | 0.43 |
| <b>P<sub>14</sub></b> | S <sub>12</sub> | 0.44 | 80 | 3.9 | 0.64 |
|                       | S <sub>13</sub> | 0.35 | 84 | 3.5 | 0.57 |
|                       | S <sub>14</sub> | 0.38 | 88 | 3.7 | 0.61 |
|                       | S <sub>15</sub> | 0.39 | 79 | 4.3 | 0.53 |
| <b>P<sub>15</sub></b> | S <sub>1</sub>  | 0.25 | 74 | 3.1 | 0.43 |
|                       | S <sub>2</sub>  | 0.28 | 77 | 3.9 | 0.49 |
|                       | S <sub>3</sub>  | 0.35 | 82 | 3.3 | 0.45 |
|                       | S <sub>4</sub>  | 0.31 | 79 | 3.7 | 0.41 |
|                       | S <sub>5</sub>  | 0.3  | 83 | 3.5 | 0.47 |

**Table 3**

Settings of initial parameters in the algorithm

| Fusing Algorithm             |                  |                                      |                |
|------------------------------|------------------|--------------------------------------|----------------|
| GA part                      |                  | ACO part                             |                |
| Population size              | 110              | Numbers of ants                      | 110            |
| Poor crossover probability   | $P_{c_0} = 0.7$  | Initial pheromone                    | 0.1            |
| Better crossover probability | $P_{c_1} = 0.3$  | Pheromone coefficient                | $\alpha = 0.4$ |
| Poor mutation probability    | $P_{m_0} = 0.3$  | Heuristic coefficient                | $b = 8$        |
| Better mutation probability  | $P_{m_1} = 0.1$  | Pheromone volatilization coefficient | $r = 0.3$      |
| Maximum iteration            | $Ge_{\max} = 50$ | Randomness coefficient               | $s = 0.3$      |
| Minimum iteration            | $Ge_{\min} = 5$  |                                      |                |
| $Ge_{die}$                   | 3                |                                      |                |

  

| Genetic Algorithm     |                   | Ant Colony Optimization              |                   |
|-----------------------|-------------------|--------------------------------------|-------------------|
| Population size       | 110               | Numbers of ants                      | 110               |
| crossover probability | $P_c = 0.7$       | Initial pheromone                    | 0.1               |
| mutation probability  | $P_m = 0.2$       | Pheromone coefficient                | $\alpha = 0.4$    |
| Maximum iteration     | $Ge_{\max} = 100$ | Heuristic coefficient                | $b = 8$           |
|                       |                   | Pheromone volatilization coefficient | $r = 0.3$         |
|                       |                   | Maximum iteration                    | $Ac_{\max} = 100$ |
